# Supplementary material
Source: Springer Nature journal article supplement (https://www.springermedizin.de/resource/supplementary/12874_2010_458_MOESM4_ESM.pdf/9432134)

Probability

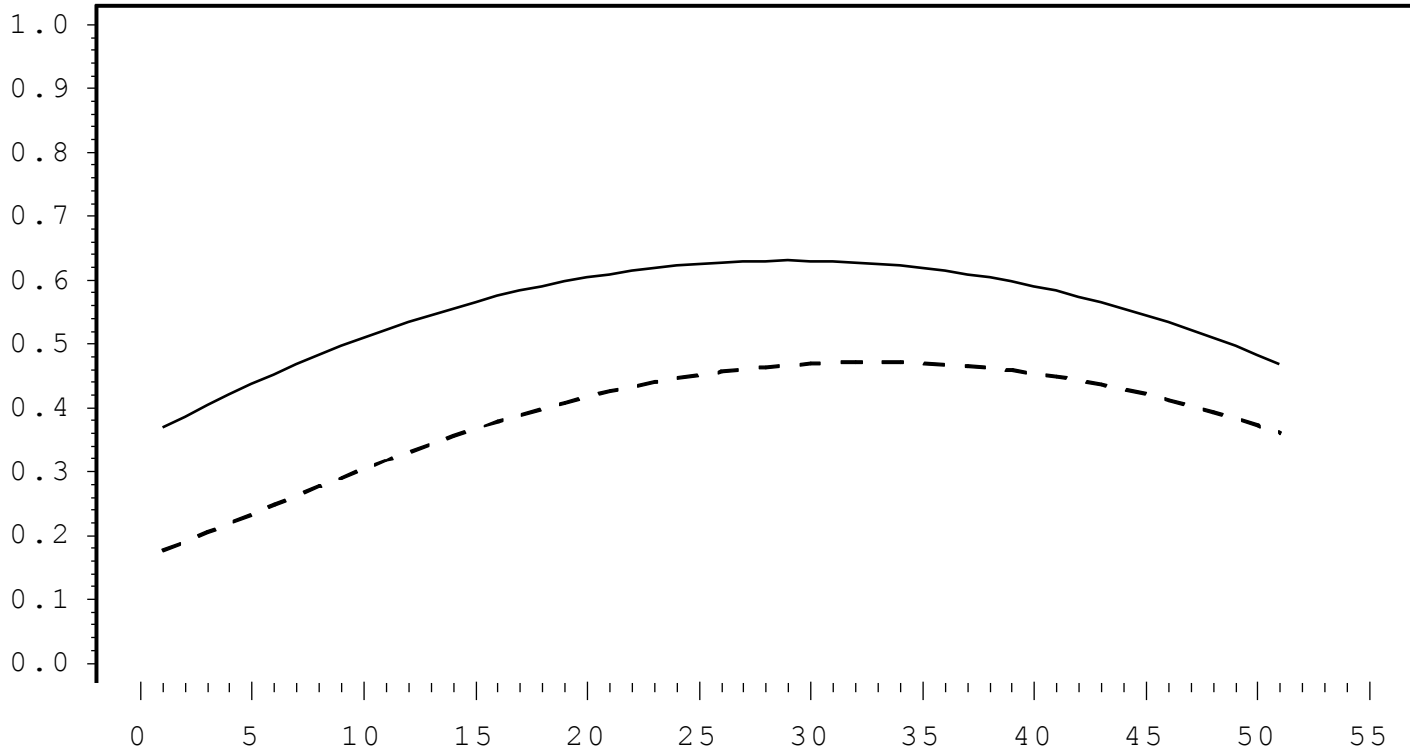

— controls      - - - - cases

Supplement: MOESM4 [file 9432134]
